# Supplementary material for: Integrity of reverse osmosis membrane for removing bacteria: new insight into bacterial passage
Source: Royal Society of Chemistry journal article supplement (doi:10.1039/c8ew00910d), 2018-12-13
Supplement: c8ew00910d1.pdf [file c8ew00910d1.pdf]

**Supporting Information**

**Integrity of reverse osmosis membrane for removing bacteria:**

**New insight into bacterial passage**

Takahiro Fujioka<sup>1,\*</sup>, Anh T. Hoang<sup>1</sup>, Tetsuro Ueyama<sup>1,2</sup>, Long D. Nghiem<sup>3</sup>

<sup>1</sup>*Water and Environmental Engineering, Graduate School of Engineering,  
Nagasaki University, 1-14 Bunkyo-machi, Nagasaki 852-8521, Japan*

<sup>2</sup>*R&D division, Kyowakiden Industry Co.,Ltd., 10-2 Kawaguchi-machi, Nagasaki 852-8108,  
Japan*

<sup>3</sup>*Centre for Technology in Water and Wastewater, University of Technology Sydney, Ultimo  
NSW 2007, Australia*

---

\* Corresponding author: Takahiro Fujioka, Email: tfujioka@nagasaki-u.ac.jp, Tel: +81 095 819 2695, Fax: +81 95 819 2620

**Table S1** – Specification of RO membrane elements.

| Name | Model             | Manufacturer | Membrane area [m <sup>2</sup> ] | Salt rejection [%] | Conditions during salt rejection measurement                                                                                           |
|------|-------------------|--------------|---------------------------------|--------------------|----------------------------------------------------------------------------------------------------------------------------------------|
| A    | ESPA2-LD-4040     | Hydranautics | 7.4                             | 99.6               | 1500 ppm NaCl solution<br>1.03 MPa Applied Pressure<br>25 °C Operating Temperature<br>15% Permeate Recovery<br>6.5 - 7.0 pH Range      |
| B    | ESPA4-4040        | Hydranautics | 7.9                             | 99.2               | 500 ppm NaCl solution<br>0.7 MPa Applied Pressure<br>25 °C Operating Temperature<br>15% Permeate Recovery<br>6.5 - 7.0 pH Range        |
| C    | BW30-4040         | Dow/Filmtec  | 7.2                             | 99.5               | 2000 ppm NaCl solution<br>1.55 MPa Applied Pressure<br>25 °C Operating Temperature<br>15% Permeate Recovery<br>pH Range: Not available |
| D    | HYDRApro-502-4040 | Hydranautics | 6.5                             | 99.5               | 1500 ppm NaCl solution<br>1.55 MPa Applied Pressure<br>25 °C Operating Temperature<br>15% Permeate Recovery<br>6.5 - 7.0 pH Range      |
| E    | ESPA-FREE 3000L   | Hydranautics | 7.0                             | 98.0               | 1500 ppm NaCl solution<br>1.05 MPa Applied Pressure<br>25 °C Operating Temperature<br>10–20% Permeate Recovery<br>6.5 - 7.5 pH Range   |

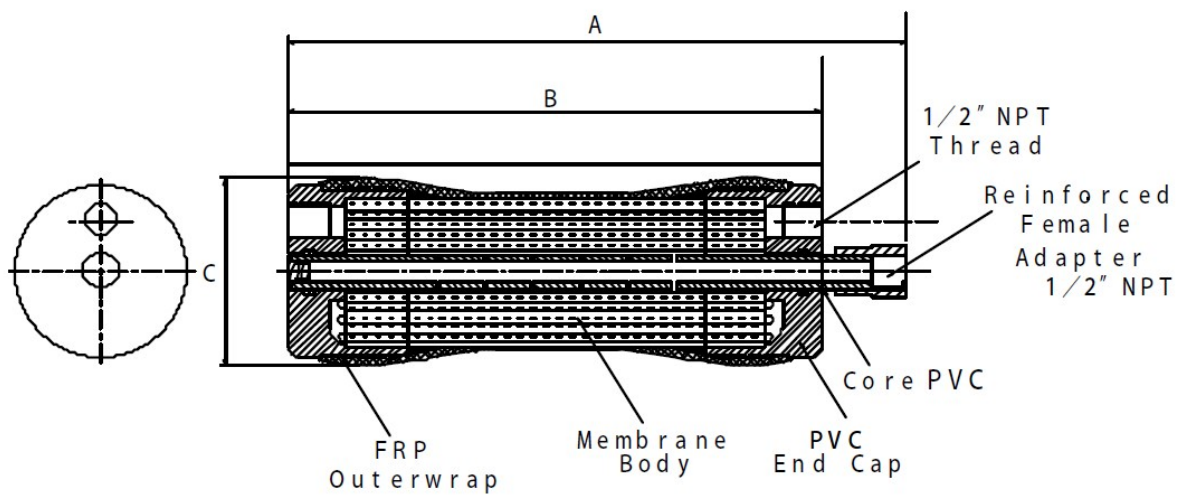

**Fig. S1** – Schematic diagram of ESPA-FREE 3000L RO membrane.

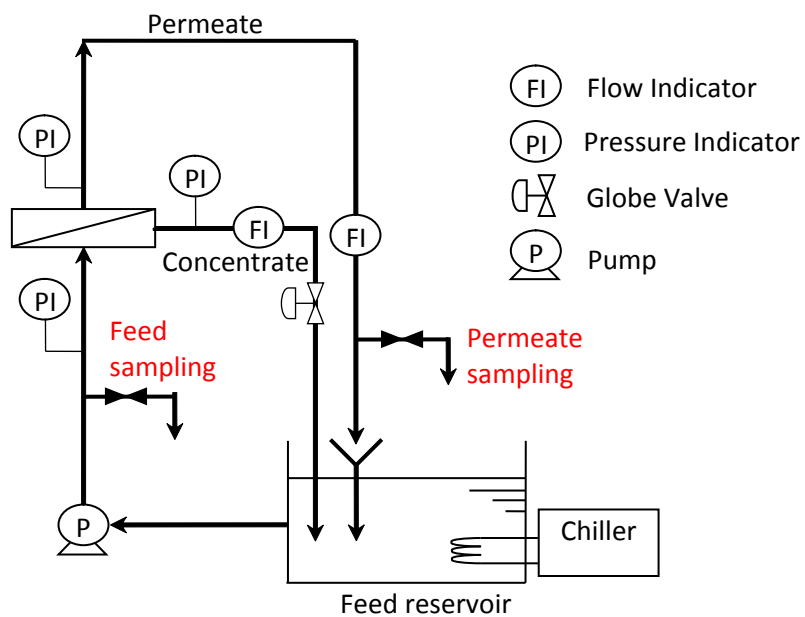

**Fig. S2** – Schematic diagram of the RO treatment system.

(a) Side-port pressure vessel

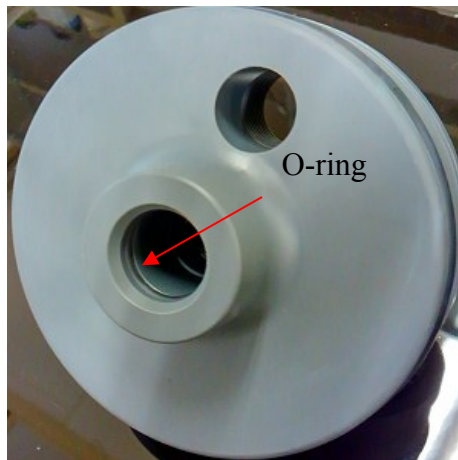

(b) End-port pressure vessel

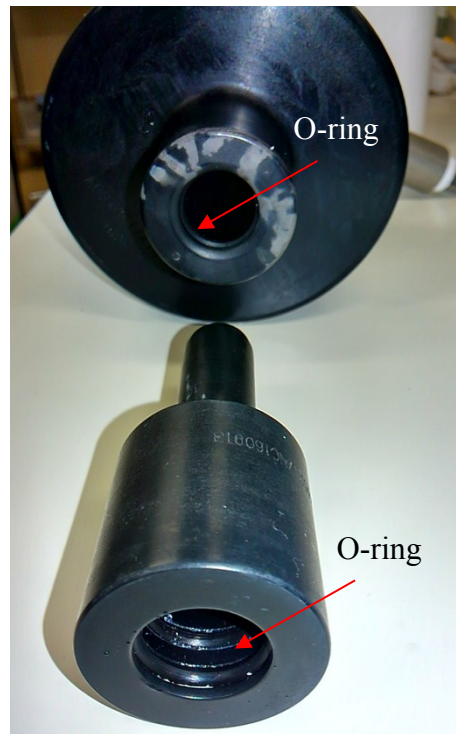

**Fig. S3** – O-rings located at the end-cap of pressure vessels.

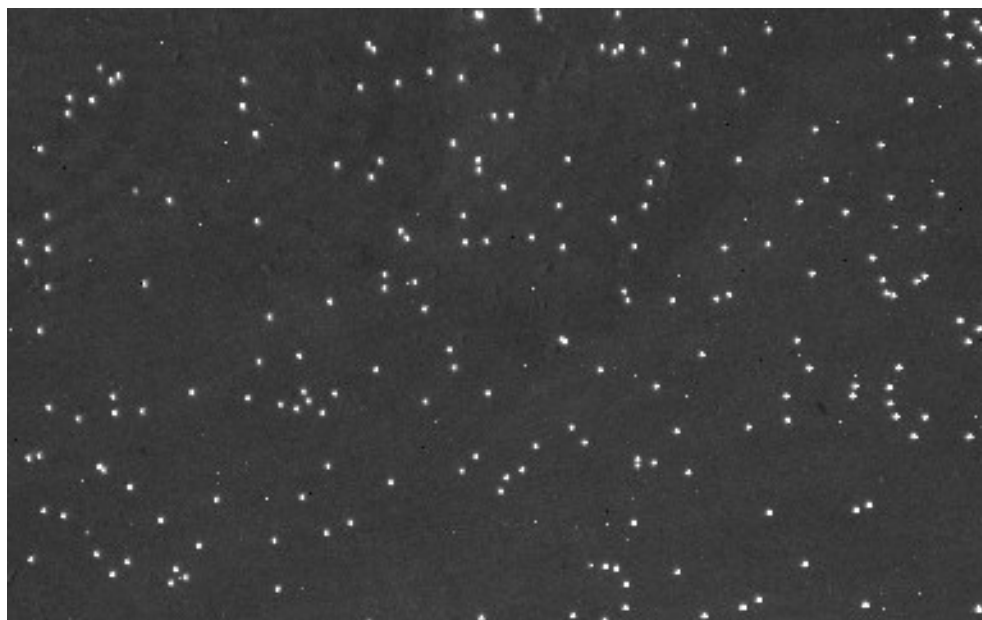

**Fig. S4** – Typical image of FL particles in feedwater during experiment.

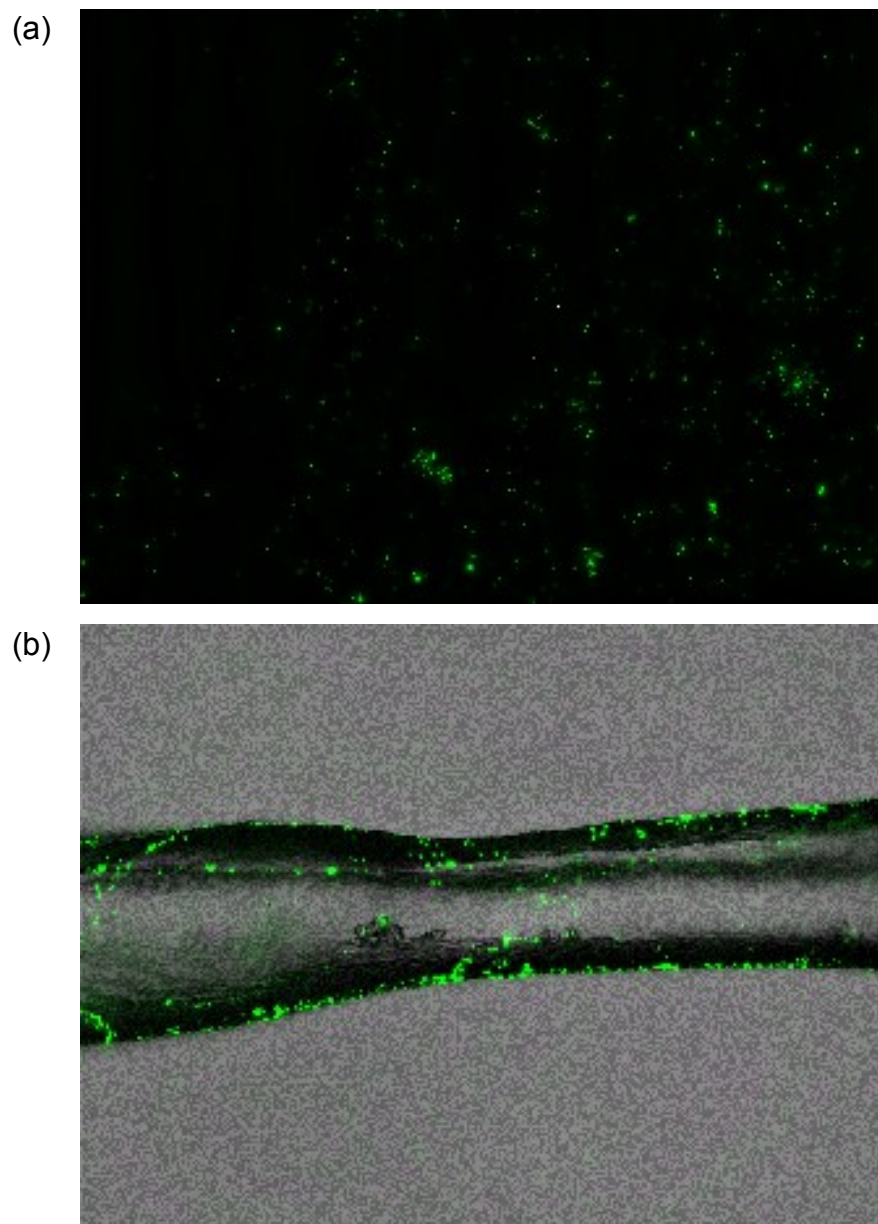

**Fig. S5** – Images of FL particles deposited on (a) RO membrane surface and (b) feed spacer. They were obtained in the feed stream at 10 cm from the entrance of ESPA2 RO element after the test. Images were taken at x400 magnification using Fluorescence Microscope BZ-X800 (KEYENCE Co., Osaka, Japan).

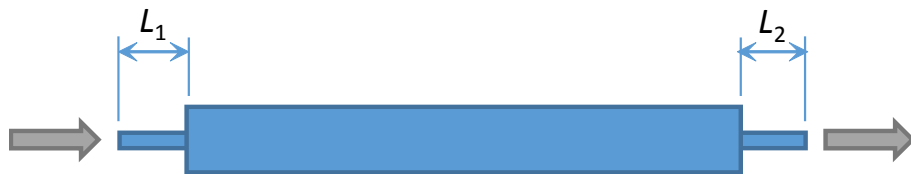

|                                 | Membrane A, B, D | Membrane C |
|---------------------------------|------------------|------------|
| Outer diameter (mm)             | 19.1             | 19.1       |
| Core tube extension, $L_1$ (mm) | 25.9             | 26.7       |
| Core tube extension, $L_2$ (mm) | 27.2             | 26.7       |

**Fig. S6** – Comparison in the size of core tube for Membranes A, B, C, and D.

**Table S2** – Total bacterial counts by epi-fluorescence microscopy using DAPI (mean  $\pm$  standard deviation,  $n = 2$ ).

| Time (min)     |                      | 10           | 30           | 60           |
|----------------|----------------------|--------------|--------------|--------------|
| Before sealing | Feedwater            | 409,656      | 298,818      | 174,414      |
|                | (counts/mL)          | $\pm 17,595$ | $\pm 8,109$  | $\pm 33,007$ |
|                | Permeate (counts/mL) | 1687         | 884          | 1022         |
|                |                      | $\pm 60$     | $\pm 35$     | $\pm 53$     |
|                | Removal (%)          | 99.6         | 99.7         | 99.4         |
|                | Removal (-log)       | 2.39         | 2.53         | 2.23         |
| After sealing  | Feedwater            | 755,864      | 594,237      | 316,935      |
|                | (counts/mL)          | $\pm 23,052$ | $\pm 18,504$ | $\pm 32,028$ |
|                | Permeate (counts/mL) | 1002         | 966          | 1120         |
|                |                      | $\pm 47$     | $\pm 85$     | $\pm 67$     |
|                | Removal (%)          | 99.8         | 99.8         | 99.7         |
|                | Removal (-log)       | 2.88         | 2.79         | 2.45         |
